# Supplementary material
Source: Springer Nature journal article supplement (https://www.springermedizin.de/resource/supplementary/12889_2014_6968_MOESM3_ESM.pdf/9499342)

**A**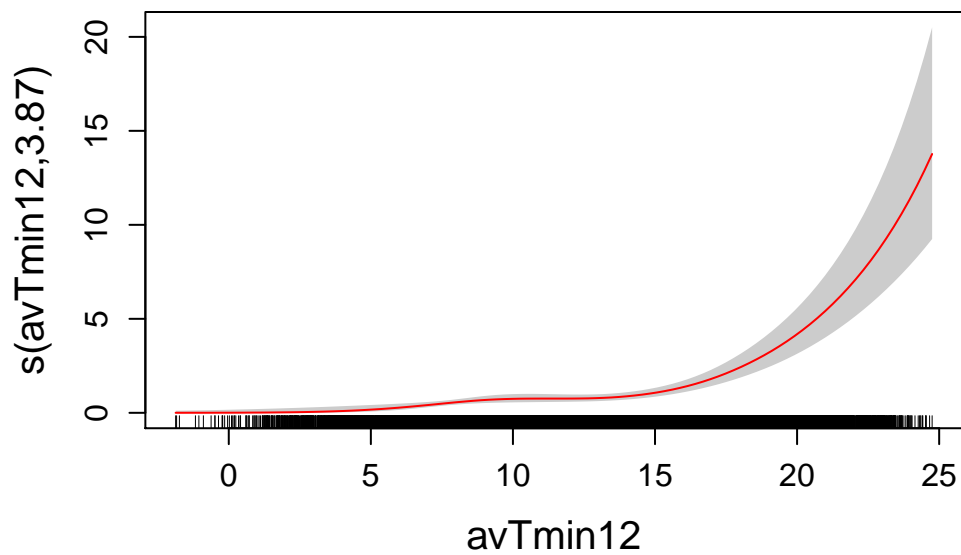**B**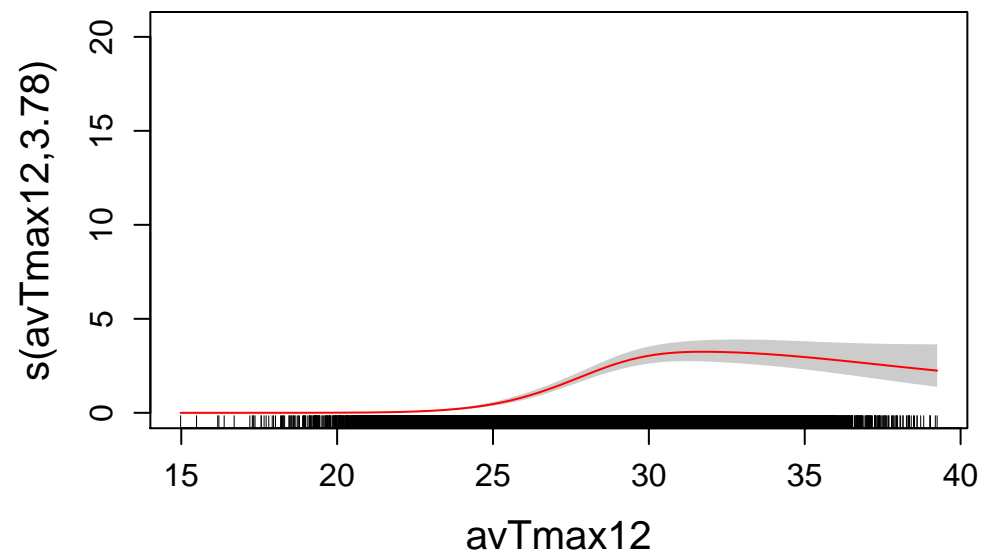**C**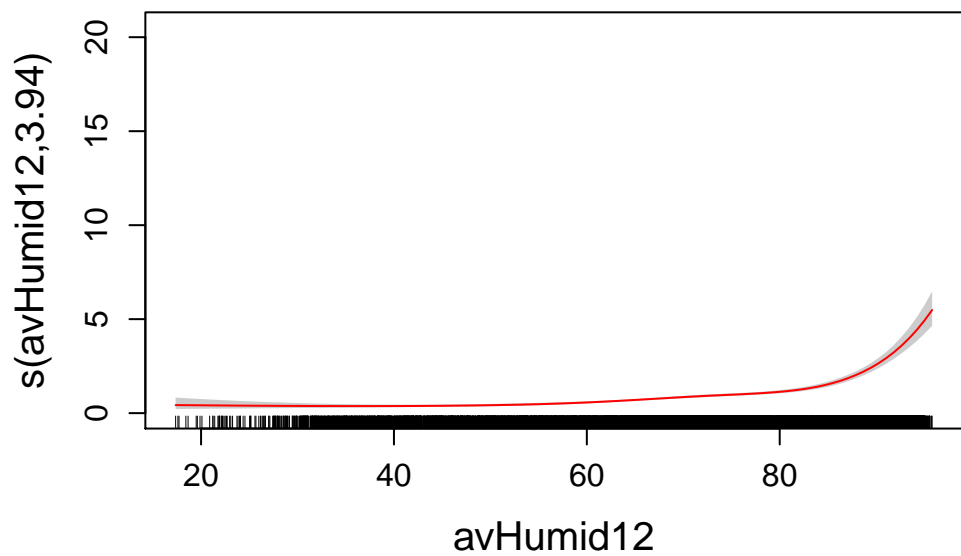**D**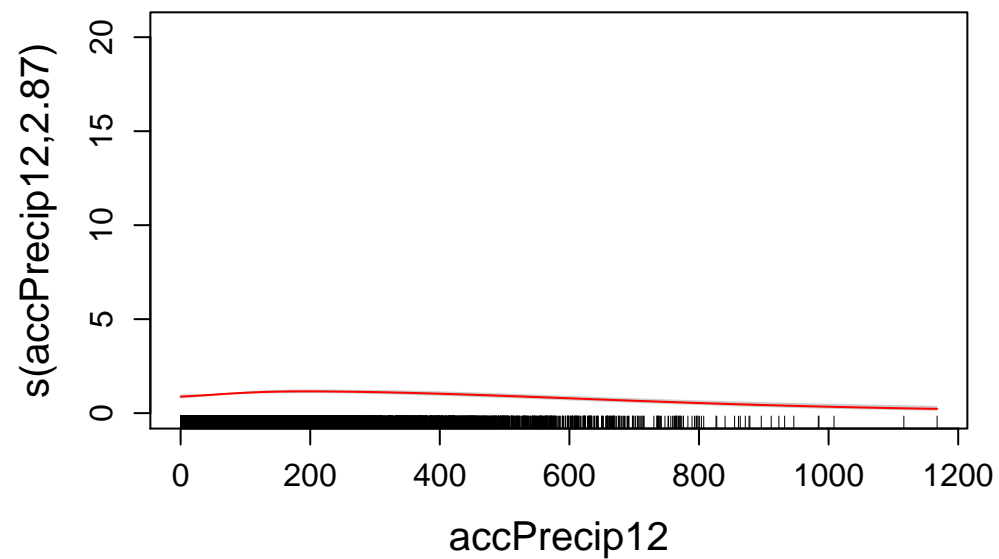

Supplement: MOESM3 [file 9499342]
